# Supplementary material for: Determinants of non-recovery in physical health-related quality of life one year after cardiac surgery: a prospective single Centre observational study
Source: Springer Nature journal article supplement (doi:10.1186/s13019-020-01273-1), 2020-09-01

ESM Table 1. Characteristics of all cardiac surgery patients in the mental recovery group and non-recovery group.

|                                          | All (n=807)      | R (n=574)          | NR (n=233)        | p-value |
|------------------------------------------|------------------|--------------------|-------------------|---------|
| <b>Demographics</b>                      |                  |                    |                   |         |
| Baseline SF 36 mental domain score       | 68 [54-81]       | 65 [49-77]         | 78 [67-89]        | <0.001* |
| Body Mass Index (kg/m <sup>2</sup> )     | 27 [25-30]       | 26.9 [24.68-29.43] | 27.1 [24.8-29.65] | 0.503   |
| <b>Comorbidities</b>                     |                  |                    |                   |         |
| CVA (%)                                  | 1.5              | 1.6                | 1.3               | 0.766   |
| Neurologic dysfunction (%)               | 1.9              | 1.9                | 1.7               | 0.849   |
| <b>Cardiac status</b>                    |                  |                    |                   |         |
| Unstable AP(%)                           | 3.5              | 3.3                | 3.9               | 0.698   |
| <b>EuroSCORE II</b>                      |                  |                    |                   |         |
| Age (%)                                  | 68.9 [62.4-75.1] | 69 [62.85-75.1]    | 68.8 [61.84-75.1] | 0.776   |
| Gender male (%)                          | 76               | 76.8               | 74.2              | 0.436   |
| Creatinine clearance (umol/l)            | 84 [73-96]       | 84 [74-96]         | 82 [72-96]        | 0.251   |
| Extracardiac arteriopathy (%)            | 7.6              | 7.0                | 9.0               | 0.320   |
| Poor Mobility (%)                        | 1.9              | 1.9                | 1.7               | 0.849   |
| Previous cardiac surgery (%)             | 3.2              | 3.0                | 3.9               | 0.512   |
| Chronic lung Disease (%)                 | 11.0             | 11.5               | 9.9               | 0.504   |
| Active endocarditis (%)                  | 0.9              | 0.9                | 0.9               | 0.986   |
| Critical pre-operative state (%)         | 0.5              | 0.5                | 0.4               | 0.864   |
| Diabetes (%)                             | 18.5             | 17.9               | 19.7              | 0.551   |
| NYHA Class III or IV (%)                 | 54               | 51                 | 59.7              | 0.026*  |
| Angina CCS Class IV (%)                  | 2.0              | 1.9                | 2.1               | 0.832   |
| LVEF (%)                                 |                  |                    |                   | 0.683   |
| Good                                     | 77.2             | 77.7               | 76                |         |
| Moderate                                 | 18.2             | 17.4               | 20.2              |         |
| Poor                                     | 3.6              | 3.7                | 3.4               |         |
| missing                                  | 1.0              | 1.2                | 0.4               |         |
| Recent MI (%)                            | 21.7             | 17.9               | 30.9              | 0.001*  |
| Pulmonary hypertension (%)               | 12.8             | 13.9               | 0.9               | 0.108   |
| Urgency (%)                              |                  |                    |                   | 0.001*  |
| Elective                                 | 49.8             | 53.8               | 39.9              |         |
| Urgent                                   | 48.8             | 45.3               | 57.5              |         |
| Emergency                                | 1.4              | 0.9                | 2.6               |         |
| Weight of intervention (%)               |                  |                    |                   | 0.091   |
| Isolated CABG                            | 68.9             | 67.1               | 73.4              |         |
| Single non CABG                          | 13.1             | 13.9               | 11.2              |         |
| 2 procedures                             | 15.9             | 16.9               | 13.3              |         |
| 3 procedures                             | 2.1              | 2.1                | 2.1               |         |
| Surgery on thoracic aorta (%)            | 2.7              | 3.1                | 1.7               | 0.262   |
| <b>Intraoperative characteristics</b>    |                  |                    |                   |         |
| Aortic cross-clamp (min)                 | 60 [42-83]       | 60 [41-84.25]      | 61 [44-78]        | 0.879   |
| ECC (min)                                | 91 [63-118]      | 90 [62.75-119]     | 91 [65.5-116]     | 0.908   |
| <b>Postoperative characteristics</b>     |                  |                    |                   |         |
| Infection (%)                            | 5.2              | 4.5                | 6.9               | 0.176   |
| First detubation (hour)                  | 3.2 [2.5-4.7]    | 3.2 [2.5-4.6]      | 3.2 [2.6-4.9]     | 0.485   |
| Re-sternotomy <30d (%)                   | 4.2              | 3.8                | 5.2               | 0.403   |
| ICU days (n)                             | 1.0 [1.0-1.0]    | 1.0 [1.0-1.0]      | 1.0 [1.0-1.0]     | 0.094   |
| ICU extended (%)                         | 5.8              | 5.4                | 6.9               | 0.420   |
| CVA (%)                                  | 0.4              | 0.0                | 1.3               | 0.006*  |
| Readmission ICU (%)                      | 0.9              | 0.7                | 1.3               | 0.412   |
| Readmission <30 days after discharge (%) | 0.9              | 0.9                | 0.9               | 0.962   |
| MI (excl. perioperative MI) (%)          | 0.7              | 0.5                | 1.3               | 0.938   |
| MI (incl. Perioperative MI) (%)          | 3.0              | 2.4                | 4.3               | 0.215   |
| PCI <1yr (%)                             | 2.2              | 1.7                | 3.4               | 0.140   |

Abbreviations: R, recovery group; NR, non-recovery group; CVA, cerebral vascular accident; AP, angina pectoris; EuroSCORE, European System for Cardiac Operative Risk Evaluation; NYHA, New York Heart Association; CCS Class 4 Angina, Inability to perform any activity without angina or angina at rest; LVEF, left ventricular ejection fraction; MI, Myocardial infarction; CABG, coronary artery bypass grafting; ECC, extracorporeal circulation; ICU, intensive care unit; PCI, percutaneous coronary intervention; \*Indicates a significant difference across groups. Data are presented as median [interquartile range] unless stated otherwise.

*ESM Table 2 . Multivariate analysis of all cardiac surgery patients. Dependent variable: mental recovery.*

|                                   | p-value | OR    | 95% CI      |
|-----------------------------------|---------|-------|-------------|
| Baseline SF36 mental domain score | <0.001  | 0.953 | 0.943-0.963 |
| Recent MI                         | 0.006   | 0.587 | 0.402-0.856 |
| Infection                         | 0.027   | 0.452 | 0.224-0.914 |
| PCI < 1 year                      | 0.017   | 0.270 | 0.092-0.793 |

Hosmer and Lemeshow  $X^2=13.889$ ,  $p=0.085$ ; Nagelkerke  $R^2=0.192$

ESM Table 3. Characteristics of isolated CABG patients in the mental recovery group and non-recovery group

|                                          | All (n=553)       | R (n=381)         | NR (n=172)        | p-value |
|------------------------------------------|-------------------|-------------------|-------------------|---------|
| <b>Demographics</b>                      |                   |                   |                   |         |
| Baseline SF 36 mental domain score       | 70 [55-82]        | 66 [52-77]        | 79 [65-90]        | <0.001* |
| Body Mass Index (kg/m <sup>2</sup> )     | 27.1 [24.8-29.6]  | 26.9 [24.8-29.4]  | 27.4 [24.8-29.7]  | 0.512   |
| <b>Comorbidities</b>                     |                   |                   |                   |         |
| CVA (%)                                  | 0.7               | 0.8               | 0.6               | 0.791   |
| Neurologic dysfunction (%)               | 1.1               | 1.0               | 1.2               | 0.906   |
| <b>Cardiac status</b>                    |                   |                   |                   |         |
| Unstable AP (%)                          | 4.9               | 4.7               | 5.2               | 0.400   |
| <b>EuroSCORE II</b>                      |                   |                   |                   |         |
| Age (years)                              | 68.4 [61.8-74.1]  | 68.6 [61.9-74.3]  | 68.3 [61.8-73.8]  | 0.574   |
| Gender male (%)                          | 83.2              | 85.8              | 77.3              | 0.013*  |
| Serum Creatinine (umol/l)                | 84.0 [74.5-95.0]  | 85.0 [76.0-94.5]  | 82.0 [72.0-96.0]  | 0.150   |
| Extracardiac arteriopathy (%)            | 7.8               | 7.1               | 9.3               | 0.368   |
| Poor Mobility (%)                        | 1.1               | 1.0               | 1.2               | 0.906   |
| Previous cardiac surgery (%)             | 1.4               | 1.0               | 2.3               | 0.245   |
| Chronic lung Disease (%)                 | 10.1              | 10.8              | 8.7               | 0.462   |
| Active endocarditis (%)                  | 0.0               | 0.0               | 0.0               | 1.000   |
| Critical preoperative state (%)          | 0.5               | 0.5               | 0.6               | 0.933   |
| Diabetes (%)                             | 19.7              | 18.9              | 21.5              | 0.475   |
| NYHA Class III or IV (%)                 | 57.1              | 54.1              | 64.0              | 0.030   |
| Angina CCS Class IV (%)                  | 2.4               | 2.4               | 2.3               | 0.979   |
| LVEF (%)                                 |                   |                   |                   | 0.448   |
| Good                                     | 79.7              | 80.1              | 76.2              |         |
| Moderate                                 | 17.6              | 16.3              | 19.8              |         |
| Poor                                     | 2.7               | 2.4               | 3.5               |         |
| missing                                  |                   | 1.3               | 0.6               |         |
| Recent MI (%)                            | 29.5              | 24.4              | 40.7              | <0.001* |
| Pulmonary hypertension (%)               | 1.8               | 2.1               | 1.2               | 0.444   |
| Urgency (%)                              |                   |                   |                   | 0.007*  |
| Elective                                 | 38.5              | 42.5              | 29.7              |         |
| Urgent                                   | 59.9              | 56.4              | 67.4              |         |
| Emergency                                | 1.6               | 1.0               | 2.9               |         |
| Weight of intervention (%)               |                   |                   |                   | 0.795   |
| Isolated CABG                            | 99.3              | 99.2              | 99.4              |         |
| Single non CABG                          | 0.0               | 0.0               | 0.0               |         |
| 2 procedures                             | 0.5               | 0.5               | 0.6               |         |
| 3 procedures                             | 0.2               | 0.3               | 0.0               |         |
| Surgery thoracic. Aorta (%)              | 0.2               | 0.0               | 0.6               | 0.137   |
| <b>Intraoperative characteristics</b>    |                   |                   |                   |         |
| Aortic cross-clamp (min)                 | 51.0 [37.0-70.0]  | 50.0 [36.0-69.5]  | 52.0 [39.0-71.0]  | 0.252   |
| ECC (min)                                | 80.0 [55.0-103.0] | 78.0 [53.0-103.0] | 84.0 [57. -105.0] | 0.154   |
| <b>Postoperative characteristics</b>     |                   |                   |                   |         |
| Infection (%)                            | 5.1               | 4.5               | 6.4               | 0.337   |
| First detubation (hour)                  | 3.0 [2.5-4.4]     | 3.08 [2.5-4.3]    | 3.0 [2.6-4.5]     | 0.634   |
| Re-sternotomy<30d (%)                    | 3.8               | 4.2               | 2.9               | 0.746   |
| ICU days (n)                             | 1.0 [1.0-1.0]     | 1.0 [1.0-1.0]     | 1.0 [1.0-1.0]     | 0.850   |
| ICU stay extended (%)                    | 1.5               | 2.6               | 2.9               | 0.850   |
| CVA (%)                                  | 0.2               | 0.0               | 0.6               | 0.136   |
| Readmission ICU (%)                      | 0.5               | 0.5               | 0.6               | 0.933   |
| Readmission <30 days after discharge (%) | 1.1               | 1.1               | 1.2               | 0.937   |
| MI (excl. perioperative) (%)             | 1.1               | 0.6               | 2.0               | 0.376   |
| MI (incl. perioperative) (%)             |                   | 2.6               | 5.8               | 0.251   |
| PCI <1yr (%)                             | 2.9               | 2.1               | 4.7               | 0.098   |

Abbreviations: R, recovery group; NR, non-recovery group; CVA, cerebral vascular accident; AP, angina pectoris; EuroSCORE, European System for Cardiac Operative Risk Evaluation; NYHA, New York Heart Association; CCS Class 4 Angina, Inability to perform any activity without angina or angina at rest; LVEF, left ventricular ejection fraction; MI, Myocardial infarction; CABG, coronary artery bypass grafting; ECC, extracorporeal circulation; ICU, intensive care unit; PCI, percutaneous coronary intervention; \*Indicates a significant difference across groups. Data are presented as median [interquartile range] unless stated otherwise.

*ESM Table 4. Multivariate analysis of isolated CABG patients. Dependent variable: mental recovery.*

|                                    | p-value | OR    | 95% CI      |
|------------------------------------|---------|-------|-------------|
| Baseline SF 36 domain score mental | <0.001  | 0.953 | 0.914-0.966 |
| Female sex                         | <0.001  | 0.383 | 0.228-0.644 |
| Previous cardiac surgery           | 0.028   | 0.185 | 0.041-0.838 |
| Recent MI                          | 0.004   | 0.537 | 0.352-0.815 |
| PCI < 1 year                       | 0.016   | 0.245 | 0.078-0.770 |

Hosmer and Lemeshow  $\chi^2=7.939$ ,  $p=0.439$ ; Nagelkerke  $R^2=0.212$

EMS Table 5. Characteristics of all cardiac surgery patients in the Responders and non-Responders group.

|                                         | Responders (n=803) | Non-Responders (n=970) | p-value |
|-----------------------------------------|--------------------|------------------------|---------|
| <b>Baseline characteristics</b>         |                    |                        |         |
| Baseline SF 36 physical domain score    | 59 [45-73]         |                        |         |
| Baseline SF 36 mental domain score      | 68 [54-81]         |                        |         |
| Body Mass Index (kg/m <sup>2</sup> )    | 27 [25-30]         | 27 [24-30]             | 0.685   |
| CVA (%)                                 | 1.5                | 2.1                    | 0.372   |
| Neurologic dysfunction (%)              | 2.0                | 4.0                    | 0.014*  |
| Unstable AP (%)                         | 3.5                | 5.3                    | 0.072   |
| <b>EuroSCORE II</b>                     | 1.6 [1.1-2.7]      | 1.9 [1.2-3.5]          | <0.001* |
| Age (years)                             | 69 [62-75]         | 69 [62-76]             | 0.773   |
| Gender Male (%)                         | 76.8               | 70.5                   | 0.003*  |
| Serum Creatinine (umol/l)               | 84 [73-96]         | 82 [71-97]             | 0.145   |
| Extracardiac arteriopathy (%)           | 7.8                | 12.0                   | 0.004*  |
| Poor mobility (%)                       | 2.0                | 4.0                    | 0.014*  |
| Previous cardiac surgery (%)            | 3.1                | 3.9                    | 0.363   |
| Chronic lung disease (%)                | 11.5               | 12.4                   | 0.555   |
| Active endocarditis (%)                 | 0.7                | 2.0                    | 0.031*  |
| Critical preoperative state (%)         | 0.5                | 2.5                    | 0.001*  |
| Diabetes (%)                            | 18.9               | 21.8                   | 0.143   |
| NYHA Class III or IV (%)                | 53.8               | 62.8                   | <0.001* |
| Angina CCS Class IV (%)                 | 1.9                | 3.2                    | 0.080   |
| LVEF (%)                                |                    |                        | 0.016*  |
| Good                                    | 77.1               | 72.5                   |         |
| Moderate                                | 18.6               | 20.2                   |         |
| Poor                                    | 4.4                | 7.3                    |         |
| Recent MI (%)                           | 21.4               | 24.4                   | 0.134   |
| Pulmonary hypertension (%)              | 12.8               | 17.5                   | 0.006*  |
| Urgency (%)                             |                    |                        | <0.004* |
| Elective                                | 50.1               | 43.8                   |         |
| Urgent                                  | 48.6               | 55.4                   |         |
| Emergency                               | 1.4                | 0.8                    |         |
| Weight of intervention (%)              |                    |                        | 0.092   |
| Isolated CABG                           | 69.4               | 66.9                   |         |
| Single Non CABG                         | 13.1               | 12.1                   |         |
| 2 Procedures                            | 15.4               | 17.0                   |         |
| 3 Procedures                            | 2.1                | 4.0                    |         |
| Surgery on thoracic aorta (%)           | 2.7                | 3.8                    | 0.209   |
| <b>Intraoperative characteristics</b>   |                    |                        |         |
| Aortic cross-clamp (min)                | 60 [42-83]         | 60 [41-84]             | 0.641   |
| ECC (min)                               | 91 [64-118]        | 90 [64-120]            | 0.847   |
| <b>Postoperative characteristics</b>    |                    |                        |         |
| Infection (%)                           | 5.6                | 7.1                    | 0.197   |
| First detubation (hour)                 | 3.2 [2.5-4.7]      | 3.1 [2.5-4.6]          | 0.333   |
| Re-sternotomy <30 d (%)                 | 4.1                | 7.3                    | 0.003*  |
| ICU days (n)                            | 1.0 [1.0-1.0]      | 1.0 [1.0-1.0]          | 0.037*  |
| ICU stay extended (%)                   | 6.0                | 10.6                   | <0.001* |
| CVA (%)                                 | 0.2                | 1.0                    | 0.046*  |
| Readmission ICU (%)                     | 1.0                | 2.1                    | 0.073   |
| Readmission <30days after discharge (%) | 1.1                | 2.0                    | 0.153   |
| MI (incl. perioperative MI) (valid%)    | 3.4                | 4.5                    | 0.111   |
| MI (excl. perioperative MI) (valid%)    | 0.9                | 1.2                    | 0.361   |
| PCI <1year (%)                          | 2.2                | 3.0                    | 0.329   |

Abbreviations: CVA, cerebral vascular accident; AP, angina pectoris; EuroSCORE, European System for Cardiac Operative Risk Evaluation; NYHA, New York Heart Association; CCS Class 4 Angina, Inability to perform any activity without angina or angina at rest; LVEF, left ventricular ejection fraction; MI, Myocardial infarction; CABG, coronary artery bypass grafting; ECC, extracorporeal circulation; ICU, intensive care unit; PCI, percutaneous coronary intervention; \*Indicates a significant difference across groups. Data are presented as median [interquartile range] unless stated otherwise.

ESM Figure 1. Flow chart of CABG patients.

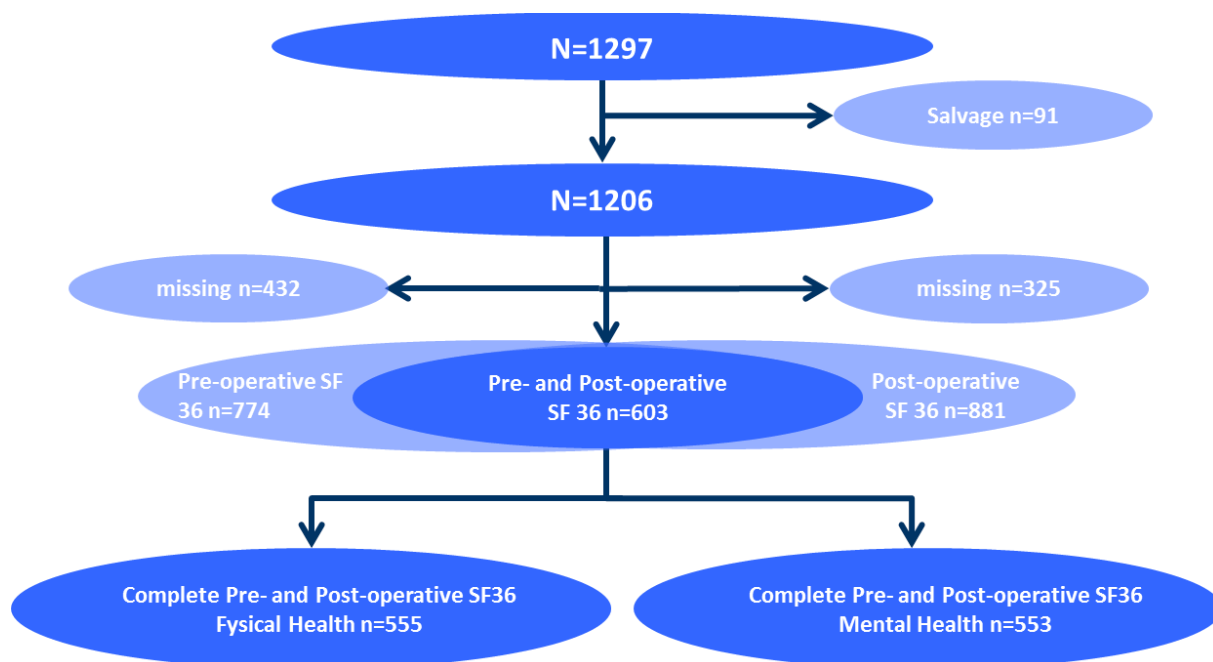

ESM Figure 2. Venn diagram of all patients. Interplay between changes in SF-36 physical and mental domain scores prior to and 1 year after surgery (%).

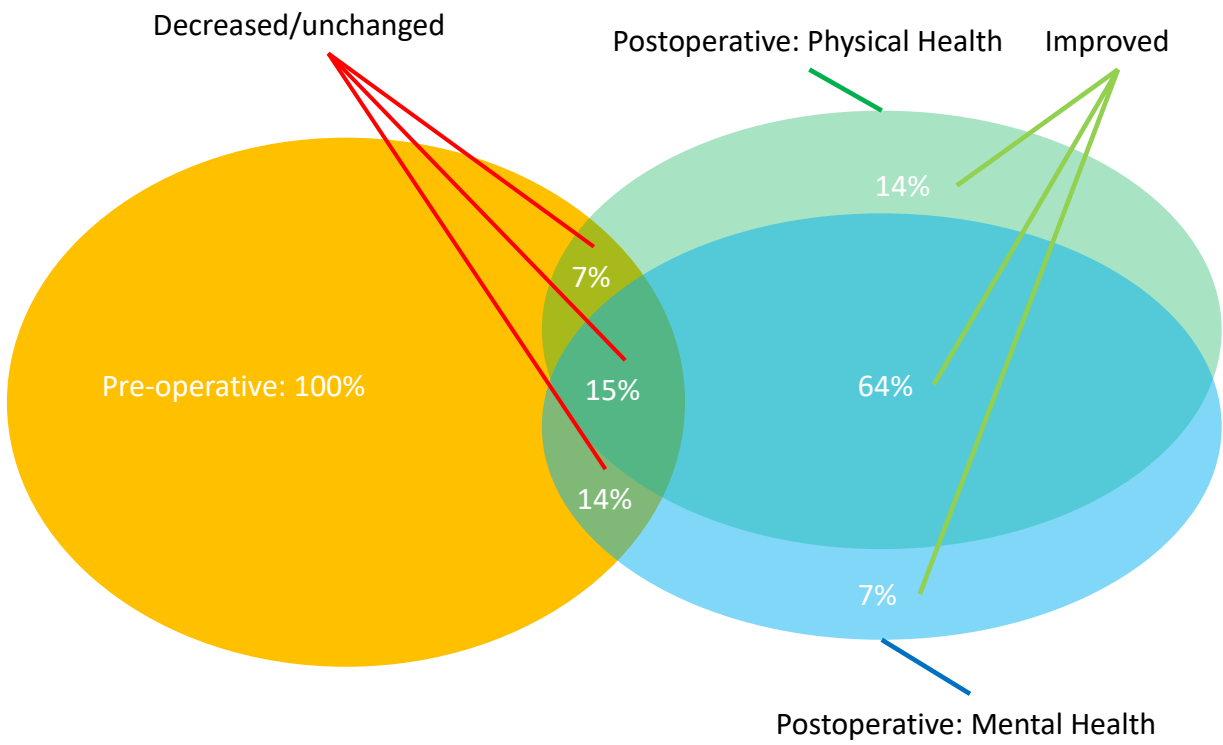

ESM Figure 3. Venn diagram of isolated CABG patients. Interplay between changes in SF-36 physical and mental domain scores prior to and 1 year after surgery.

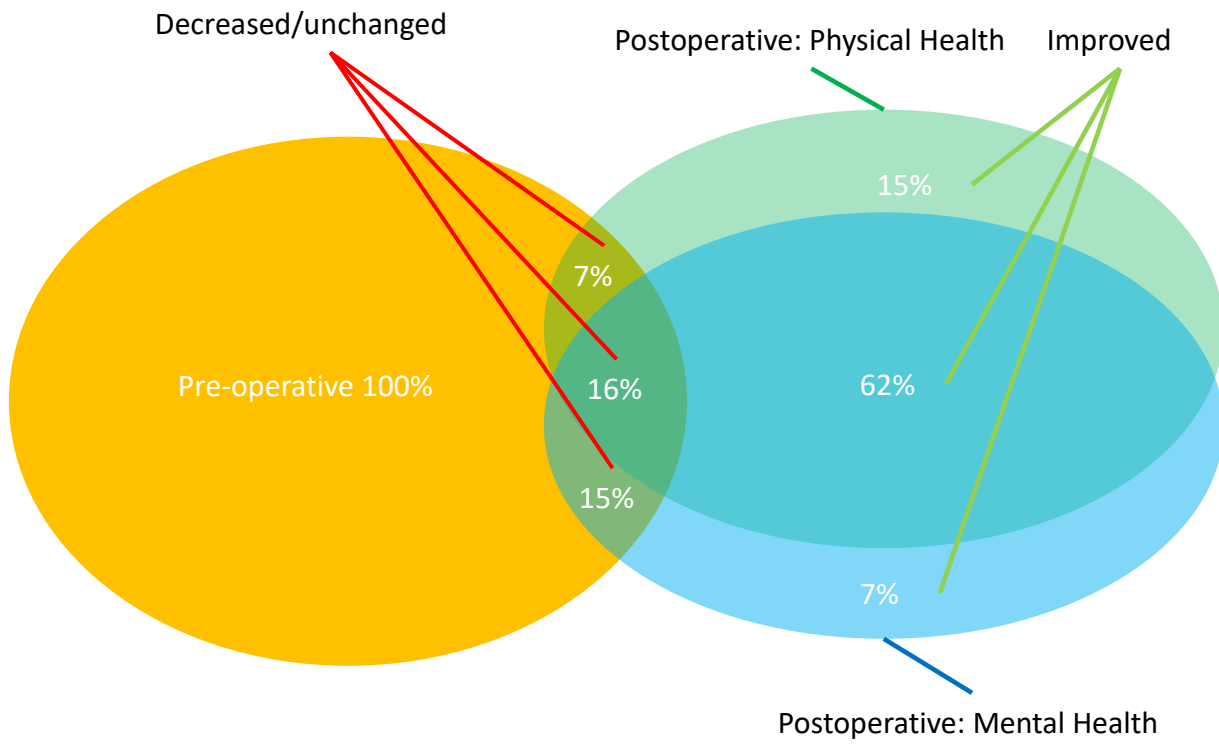

Supplement: MOESM1 [file 18337978]
